# Supplementary material for: Preventive Effects of Fluoro-Substituted Benzothiadiazole Derivatives and Chitosan Oligosaccharide against the Rice Seedling Blight Induced by Fusarium oxysporum
Source: MDPI journal article supplement (doi:10.3390/plants8120538), 2019-11-24
Supplement: s1 [file s1]

# Preventive Effects of Fluoro-substituted Benzothiadiazole Derivatives and Chitosan Oligosaccharide against the Rice Seedling Blight Induced by *Fusarium oxysporum*

## The Detailed Description of Sample Preparation for Proteomics

### 1.1 Trypsin Digestion

For digestion, the protein solution was reduced with 10 mM DTT for 1 h at 37 °C and alkylated with 20 mM IAA for 45 min at room temperature in darkness. For trypsin digestion, the protein sample was diluted by adding 100 mM TEAB to urea concentration less than 2M. Finally, trypsin was added at 1:50 trypsin-to-protein mass ratio for the first digestion overnight and 1:100 trypsin-to-protein mass ratio for a second 4 h-digestion. Approximately 100 µg protein for each sample was digested with trypsin for the following experiments.

### 1.2 TMT Labeling

After trypsin digestion, peptide was desalted by Strata X C18 SPE column (Phenomenex) and vacuum-dried. Peptide was reconstituted in 0.5 M TEAB and processed according to the manufacturer's protocol for 6-plex TMT kit. Briefly, one unit of TMT reagent (defined as the amount of reagent required to label 100 µg of protein) were thawed and reconstituted in 24 µl ACN. The peptide mixtures were then incubated for 2 h at room temperature and pooled, desalted and dried by vacuum centrifugation.

**Table 1** Labeling information

| Sample Groups | Labeling information |
|---------------|----------------------|
| CK            | 126                  |
| OCN           | 127                  |
| FBT           | 128                  |

### 1.3 HPLC Fractionation

The sample was then fractionated into fractions by high pH reverse-phase HPLC using Agilent 300 Extend C18 column (5 µm particles, 4.6 mm ID, 250 mm length). Briefly, peptides were first separated with a gradient of 2% to 60% acetonitrile in 10 mM ammonium bicarbonate pH 10 over 80 min into 80 fractions. Then, the peptides were combined into 18 fractions and dried by vacuum centrifuging.

### 1.4 LC-MS/MS Analysis

Peptides were dissolved in 0.1% FA, directly loaded onto a reversed-phase pre-column (Acclaim PepMap 100, Thermo Scientific). Peptide separation was performed using a reversed-phase analytical column (Acclaim PepMap RSLC, Thermo Scientific). The gradient was comprised of an increase from 6% to 22% solvent B (0.1% FA in 98%

ACN) over 22 min, 22% to 36% in 10 min and climbing to 85% in 5 min then holding at 85% for the last 3 min, all at a constant flow rate of 400 nl/min on an EASY-nLC 1000 UPLC system, The resulting peptides were analyzed by Q Exactive<sup>TM</sup> plus hybrid quadrupole-Orbitrap mass spectrometer (ThermoFisher Scientific).

The peptides were subjected to NSI source followed by tandem mass spectrometry (MS/MS) in Q Exactive<sup>TM</sup> plus (Thermo) coupled online to the UPLC. Intact peptides were detected in the Orbitrap at a resolution of 70,000. Peptides were selected for MS/MS using NCE setting as 30; ion fragments were detected in the Orbitrap at a resolution of 17,500. A data-dependent procedure that alternated between one MS scan followed by 20 MS/MS scans was applied for the top 20 precursor ions above a threshold ion count of 1E4 in the MS survey scan with 30.0s dynamic exclusion. The electrospray voltage applied was 2.0 kV. Automatic gain control (AGC) was used to prevent overfilling of the orbitrap; 5E4 ions were accumulated for generation of MS/MS spectra. For MS scans, the m/z scan range was 350 to 1800. Fixed first mass was set as 100 m/z.

**Table S1** Grading standard of rice seedlings blight

| Grade | Incidence                                                                        |
|-------|----------------------------------------------------------------------------------|
| 0     | No symptoms                                                                      |
| 1     | Disease spots at stem base are small and occupy below 1/4 of stem circumference  |
| 2     | Diseased spots at stem base are larger and occupy 1/4-1/2 of stem circumference  |
| 3     | Diseased spots at stem base are larger and occupy 1/2-3/4 of stem circumference  |
| 4     | Diseased spots at the base of stem occupied all stem circumference and plant die |

**Table S2** Primer sequences of Protein for RT-qPCR.

| KEGG description                                  | Protein<br>accession | Genes | Primer sequence (5'-3')                            |
|---------------------------------------------------|----------------------|-------|----------------------------------------------------|
| 1.ent-copalyl<br>diphosphate<br>synthases         | Os02t057<br>0900-00  |       | F: TATGATGACCCTGCCTTGCA<br>R: CTATGGAGCAAGGTGGTCGG |
| 2.ent-cassa-12,15-die<br>ne synthase              | Os02t057<br>0400-01  |       | F: CAGGCCGTGAAGAGATCGAG<br>R: AGCCCTTAGCGTCGAAAAGC |
| 3.ent-kaurene<br>oxidase                          | Os06t056<br>9500-01  |       | F: CGTGCCACATGGACGAGAAG<br>R: CCGAACGCCATCGTCTTGTA |
| 4.ent-cassa-12,15-die<br>ne 11-hydroxylases       | Os02t056<br>9900-01  |       | F: CGTTCCACCACAAGCTCAGG<br>R: CTTGGTGTACGCCTCGATGG |
| 5.sandaracopimaradi<br>ene/labdatiene<br>synthase | Os12t049<br>1800-01  |       | F: TGCGTGCTCTCACTGACAGC<br>R: AACTCCGCATCTCCACCATG |
| 6.syn-copalyl-diphos<br>phate synthase            | Os04t017<br>8300-02  |       | F: GCCGGTCTTCACTGCATCAT<br>R:GAAGGTGTAGGAACGGCCGT  |
| 7.9beta-pimara-7,15-<br>diene oxidase             | Os04t017<br>8400-01  |       | F: TCAAGGAGACCCTGAGGCTG<br>R:TCTGGTGCCCTCCACAATCT  |
| 8.momilactone-A<br>synthase                       | Os04t017<br>9200-01  |       | F: GAACTCGGCGAACCTGAAGG<br>R:AAGCTGCTGTTGACGACGGA  |

**Table S3** DEPs annotated as peroxidase in FBT and COS-treated

| Protein accession | Protein description                                                             | FBT/CK Ratio | OCN/CK Ratio |
|-------------------|---------------------------------------------------------------------------------|--------------|--------------|
| Os01t0205900-02   | Similar to Class III peroxidase GvPx2b (Fragment).                              | 1.019        | 1.055        |
| Os01t0263300-01   | Similar to Peroxidase 72 precursor (EC 1.11.1.7) (Atperox P72) (PRXR8) (ATP6a). | 0.984        | 0.884        |
| Os01t0270300-02   | Similar to Cationic peroxidase isozyme 40K precursor.                           | 0.982        | 0.932        |
| Os01t0294500-00   | Similar to Class III peroxidase 9.                                              | 1.359        | 0.967        |
| Os01t0294700-01   | Haem peroxidase, plant/fungal/bacterial family protein.                         | 0.832        | 0.818        |
| Os01t0326000-01   | Similar to Peroxidase (Fragment).                                               | 1.019        | 0.913        |
| Os01t0326300-01   | Haem peroxidase, plant/fungal/bacterial family protein.                         | 1.323        | 1.105        |
| Os01t0327100-01   | Haem peroxidase family protein.                                                 | 1.361        | 1.400        |
| Os01t0327400-01   | Similar to Peroxidase (Fragment).                                               | 1.343        | 1.271        |
| Os01t0378100-01   | Plant peroxidase domain containing protein.                                     | 1.050        | 1.023        |
| Os01t0543100-01   | Similar to Peroxidase 72 precursor (EC 1.11.1.7) (Atperox P72) (PRXR8) (ATP6a). | 1.019        | 0.930        |
| Os01t0962700-01   | Similar to Peroxidase 12 precursor (EC 1.11.1.7) (Atperox P12) (PRXR6) (ATP4a). | 1.530        | 1.420        |
| Os02t0192700-02   | Similar to Thioredoxin peroxidase.                                              | 0.872        | 1.162        |
| Os02t0236600-01   | Peroxidase P7 (EC 1.11.1.7) (TP7).                                              | 0.727        | 0.730        |
| Os02t0236800-02   | Similar to Peroxidase (EC 1.11.1.7).                                            | 0.846        | 0.875        |
| Os02t0240100-01   | Similar to Peroxidase 2 (Fragment).                                             | 1.451        | 1.115        |
| Os02t0240300-01   | Similar to Class III peroxidase GvPx2b (Fragment).                              | 1.157        | 0.974        |
| Os03t0121200-03   | Similar to Class III peroxidase 33.                                             | 1.330        | 1.090        |
| Os03t0121300-01   | Similar to Peroxidase 1.                                                        | 1.602        | 1.467        |
| Os03t0235000-01   | Similar to Peroxidase.                                                          | 1.560        | 1.564        |
| Os03t0339400-01   | Haem peroxidase, plant/fungal/bacterial family protein.                         | 0.937        | 0.634        |
| Os03t0368300-01   | Similar to Peroxidase 1.                                                        | 1.297        | 1.018        |
| Os03t0368900-01   | Haem peroxidase family protein.                                                 | 0.655        | 0.555        |
| Os03t0762300-02   | Similar to peroxidase 51.                                                       | 0.711        | 0.660        |
| Os04t0423800-01   | Peroxidase (EC 1.11.1.7).                                                       | 0.648        | 0.642        |
| Os04t0465100-01   | Haem peroxidase, plant/fungal/bacterial family protein.                         | 0.983        | 0.908        |

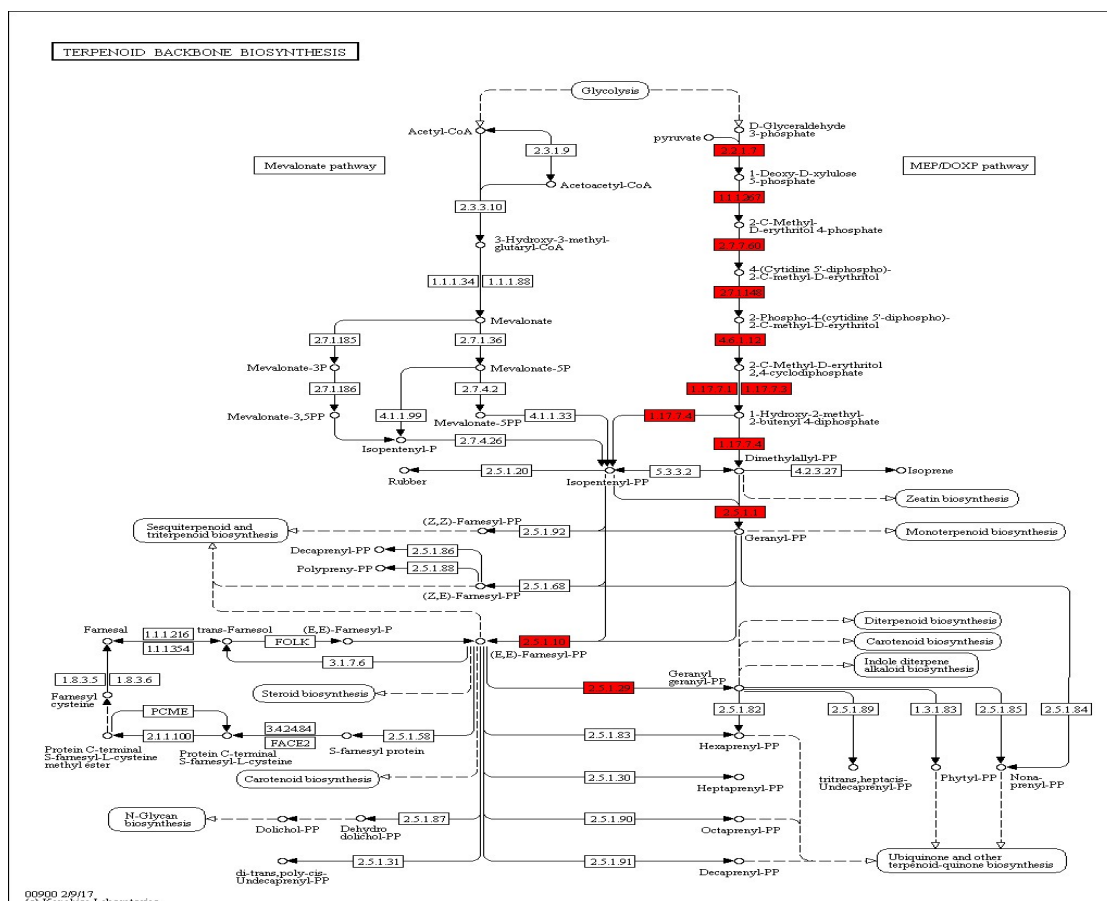

**Figure S1 Illustration of KEGG pathway of terpenoid backbone biosynthesis in oligochitosan-treated roots. Red means up-regulated proteins in FBT and COS-treated roots compared to control root.**
